# Supplementary material for: Simultaneously improved electrical properties of crystalline YbAl3 thin films prepared by co-sputtering technique
Source: Royal Society of Chemistry journal article supplement (doi:10.1039/c7ra02366a), 2017-01-01
Supplement: c7ra02366a1.pdf [file c7ra02366a1.pdf]

## Supplementary information

### Simultaneously improved electrical properties of crystalline YbAl<sub>3</sub> thin films prepared by co-sputtering technique

Ran-Ran Li,<sup>1</sup> Dan-Qi He,<sup>1</sup> Xin Mu,<sup>1</sup> Hong-Yu Zhou,<sup>1</sup> Ping Wei,<sup>\* 1</sup> Wan-Ting Zhu,<sup>1</sup> Xiao-Lei Nie,<sup>1</sup> Wen-Yu Zhao,<sup>\* 1</sup> Qing-Jie Zhang<sup>1</sup>

<sup>1</sup> State Key Laboratory of Advanced Technology for Materials Synthesis and Processing, Wuhan University of Technology, Wuhan 430070, China.

Email: pingwei@whut.edu.cn; wyzhao@whut.edu.cn

X-ray photoelectron spectroscopy (XPS) was used to confirm the composition variation along the film thickness. The collection of valence-band spectra was performed on a model VG Thermo Multilab 2000 X-ray photoelectron spectrometer, using a monochromatic Al K $\alpha$  line with a photon energy of 1486.6 eV and a 180 hemispherical analyzer in a constant-resolution mode with a pass energy of 25 eV. The energy resolution was determined to be 0.6 eV based on the analysis of the Ag Fermi edge. The energy step size and spot size were kept at 0.05 eV and OFF. By inclining the incident X-ray beam at different angles from 0° to 45°, the compositions along the different detection depths can be evaluated. The results are plotted in Figure S1. It can be seen that the core-level spectra of Yb4d<sub>5/2</sub> peak at about 185.5 eV, indicating a chemical valence of Yb<sup>3+</sup>.<sup>[1]</sup> With increasing the degree of incident X-ray beam from 0° to 45°, the relative content of Al increases while that of Yb decreased gradually. Although the detection depth of XPS is limited in less than 20 nm just below the surface, these results suggest a continuous decrease of Al along the thickness. The tendency is consistent with our EPMA results. Note that the Al contents measured by XPS are much higher than the EPMA results, which can be attributed to the contribution of the precipitated Al bulges on the surface.

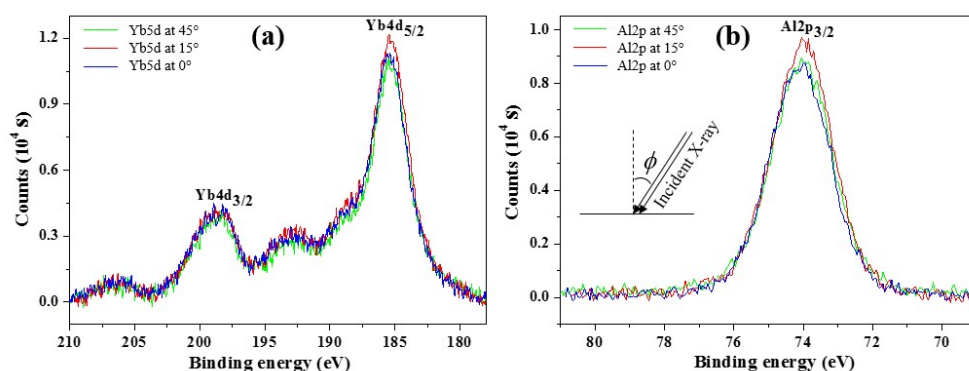

(c)

| $\phi$ | Yb 5d     |               |      | Al 2p     |               |      |
|--------|-----------|---------------|------|-----------|---------------|------|
|        | FWHM (eV) | area (CPS·eV) | at%  | FWHM (eV) | area (CPS·eV) | at%  |
| 0°     | 3.54      | 88660         | 14.5 | 1.99      | 20724         | 85.5 |
| 15°    | 3.49      | 92090         | 13.8 | 1.85      | 22734         | 86.2 |
| 45°    | 3.52      | 83085         | 12.8 | 2.02      | 22281         | 87.2 |

Figure S1. Yb5d and Al 2p core-level XPS spectra gained by inclining the incident X-ray beam at different incident angles from 0° to 45° (as simply illustrated in the inset). All the spectra have been numerical treated with background removing.

[1] Thompson AC, Vaughan D. X-ray data booklet, Lawrence Berkeley laboratory. Berkeley: University of California; 1986.
